# Supplementary material for: Effect of faecal calprotectin testing on referrals for children with chronic gastrointestinal symptoms in primary care: study protocol for a cluster randomised controlled trial
Source: HighWire-hosted journal article supplement (doi:10.1136/bmjopen-2020-045444), 2021-07-01
Supplement: bmjopen-2020-045444supp002_data_supplement.pdf [file bmjopen-2020-045444supp002_data_supplement.pdf]

**Supplementary File 2. Online training modules**

- 1) **Introduction:** The aim of this module is to teach the GP about the differential diagnosis, prevalence, and definitions of chronic gastrointestinal symptoms in children in primary care.
- 2) **Case 1:** A teenager in whom there is a high suspicion of IBD. This module aims to teach the GP about alarm symptoms for IBD, the diagnostic value of calprotectin ( $>250 \mu\text{g/g}$ ) and the causes of false-positive results.
- 3) **Case 2:** A school-aged child with functional abdominal pain. This module aims to teach the GP about the indication for testing, the diagnostic value and the follow-up approach for calprotectin values between 50 and  $250 \mu\text{g/g}$ .
- 4) **Case 3:** A teenager with chronic abdominal pain and one alarm symptom. This module aims to teach the GP about the diagnostic value of a calprotectin value  $<50 \mu\text{g/g}$  and the pros and cons of referral. It also provides tips for communication with a child/parent about FGID.
- 5) **Proficiency test:** The test includes ten questions that address the key messages of the online training. The GP has three chances to attain seven correct answers.
