# Supplementary material for: Effect of faecal calprotectin testing on referrals for children with chronic gastrointestinal symptoms in primary care: study protocol for a cluster randomised controlled trial
Source: HighWire-hosted journal article supplement (doi:10.1136/bmjopen-2020-045444), 2021-07-01
Supplement: bmjopen-2020-045444supp003_data_supplement.pdf [file bmjopen-2020-045444supp003_data_supplement.pdf]

## Supplementary File 3. Data collection from medical records over 6 months

| Variable                                        |        |              |                 |     |                |       |
|-------------------------------------------------|--------|--------------|-----------------|-----|----------------|-------|
| <b>Alarm symptoms for IBD<sup>a</sup></b>       |        |              |                 |     |                |       |
| Positive family history for IBD                 | Yes/no | Date         |                 |     |                |       |
| Rectal bleeding                                 | Yes/no | Date         |                 |     |                |       |
| Involuntary weight loss                         | Yes/no | Date         |                 |     |                |       |
| Decreased growth velocity                       | Yes/no | Date         |                 |     |                |       |
| Aphthous stomatitis                             | Yes/no | Date         |                 |     |                |       |
| Arthritis                                       | Yes/no | Date         |                 |     |                |       |
| Eye inflammation                                | Yes/no | Date         |                 |     |                |       |
| Skin abnormalities                              | Yes/no | Date         |                 |     |                |       |
| Perianal abnormalities                          | Yes/no | Date         |                 |     |                |       |
| <b>Diagnosis</b>                                |        |              |                 |     |                |       |
| GP's diagnosis at index consultation            | FGID   | Constipation | Gastroenteritis | IBD | Celiac disease | Other |
| GP's diagnosis at 6 months follow-up            | FGID   | Constipation | Gastroenteritis | IBD | Celiac disease | Other |
| Paediatrician's diagnosis at 6 months follow-up | FGID   | Constipation | Gastroenteritis | IBD | Celiac disease | Other |
| <b>Diagnostic tests</b>                         |        |              |                 |     |                |       |
| Haemoglobin                                     | Yes/no | Date         | Test result     |     |                |       |
| Leukocytes                                      | Yes/no | Date         | Test result     |     |                |       |
| Thrombocytes                                    | Yes/no | Date         | Test result     |     |                |       |
| CRP                                             | Yes/no | Date         | Test result     |     |                |       |
| ESR                                             | Yes/no | Date         | Test result     |     |                |       |
| Anti-transglutaminase IgA antibody              | Yes/no | Date         | Test result     |     |                |       |
| IgA antibody                                    | Yes/no | Date         | Test result     |     |                |       |
| Other blood test                                | Yes/no | Date         | Test result     |     |                |       |
| Faecal calprotectin POCT                        | Yes/no | Date         | Test result     |     |                |       |
| Faecal calprotectin sent to laboratory          | Yes/no | Date         | Test result     |     |                |       |
| Faecal culture                                  | Yes/no | Date         | Test result     |     |                |       |
| Faecal ova and parasite test                    | Yes/no | Date         | Test result     |     |                |       |

|                                     |                  |               |                         |                 |              |       |
|-------------------------------------|------------------|---------------|-------------------------|-----------------|--------------|-------|
| Urine dipstick                      | Yes/no           | Date          | Test result             |                 |              |       |
| Urinalysis                          | Yes/no           | Date          | Test result             |                 |              |       |
| Urine culture                       | Yes/no           | Date          | Test result             |                 |              |       |
| Abdominal ultrasound                | Yes/no           | Date          | Test result             |                 |              |       |
| X-abdomen                           | Yes/no           | Date          | Test result             |                 |              |       |
| Other radiology tests               | Yes/no           | Date          | Test result             |                 |              |       |
| <b>Referral</b>                     |                  |               |                         |                 |              |       |
| Referral                            | Yes/no           | Paediatrician | Ped. gastroenterologist | Physiotherapist | Psychologist | Other |
| Reason for referral according to GP | <i>Free text</i> |               |                         |                 |              |       |
| <b>Medication</b>                   |                  |               |                         |                 |              |       |
| Analgesics                          | Yes/no           | Name          | Frequency               | Dosage          | Duration     |       |
| Laxatives                           | Yes/no           | Name          | Frequency               | Dosage          | Duration     |       |
| Spasmolytics                        | Yes/no           | Name          | Frequency               | Dosage          | Duration     |       |
| Antibiotics                         | Yes/no           | Name          | Frequency               | Dosage          | Duration     |       |
| Other medication                    | Yes/no           | Name          | Frequency               | Dosage          | Duration     |       |
| <b>Consultations</b>                |                  |               |                         |                 |              |       |
| GP                                  | Yes/no           | How often     |                         |                 |              |       |
| <b>Health care use in hospital</b>  |                  |               |                         |                 |              |       |
| Emergency room                      | Yes/no           | How often     |                         |                 |              |       |
| Use of ambulance                    | Yes/no           | How often     |                         |                 |              |       |
| Endoscopy                           | Yes/no           | Result        |                         |                 |              |       |
| Surgery                             | Yes/no           | Which surgery |                         |                 |              |       |
| Hospital admission                  | Yes/no           | Duration      |                         |                 |              |       |

<sup>a</sup> Per definitions in Table 1.

Abbreviations: CRP, C-reactive protein; ESR, erythrocyte sedimentation rate; FGID, functional gastrointestinal disease; GP, general practitioner; IBD, inflammatory bowel disease; IgA, Immunoglobulin A; Ped, paediatric; POCT, point-of-care-test
