# Supplementary material for: Effect of faecal calprotectin testing on referrals for children with chronic gastrointestinal symptoms in primary care: study protocol for a cluster randomised controlled trial
Source: HighWire-hosted journal article supplement (doi:10.1136/bmjopen-2020-045444), 2021-07-01
Supplement: bmjopen-2020-045444supp004_data_supplement.pdf [file bmjopen-2020-045444supp004_data_supplement.pdf]

**Supplementary File 4. Relevant International Classification of Primary Care Codes**

|            |                                     |
|------------|-------------------------------------|
| <b>D01</b> | Abdominal pain / cramps general     |
| <b>D02</b> | Abdominal pain epigastric           |
| <b>D06</b> | Abdominal pain localised other      |
| <b>D11</b> | Diarrhoea                           |
| <b>D12</b> | Constipation                        |
| <b>D16</b> | Rectal bleeding                     |
| <b>D18</b> | Change in faeces / bowel movements  |
| <b>D27</b> | Fear of digestive disease other     |
| <b>D29</b> | Digestive symptom / complaint other |
| <b>D93</b> | Irritable bowel syndrome            |
| <b>D99</b> | Disease digestive system other      |
