# Supplementary material for: Effect of faecal calprotectin testing on referrals for children with chronic gastrointestinal symptoms in primary care: study protocol for a cluster randomised controlled trial
Source: HighWire-hosted journal article supplement (doi:10.1136/bmjopen-2020-045444), 2021-07-01
Supplement: bmjopen-2020-045444supp005_data_supplement.pdf [file bmjopen-2020-045444supp005_data_supplement.pdf]

## Supplementary File 5. Consent Forms

### CONSENT FORM PARTICIPANTS

*For participants aged 12 – 17 years\**

I have been asked to give consent for participation in this medically scientific research.

- I have read the patient information letter. It was possible to ask questions. My questions are sufficiently answered. I had enough time to decide whether I want to participate.
- I know that my participation is voluntary. I know I can decide at any moment to end my participation without providing a reason.
- I give consent to collect and use my data for the purposes mentioned in the patient information letter.
- I know that some persons can look at my data. These persons are mentioned in the patient information letter.
- I agree to participate in this research.

#### Please tick the boxes:

- I give consent to use my data for a maximum of 15 years for comparable scientific research in the future.
- I give consent to be approached for future research.

#### Please fill in:

|                     |                       |
|---------------------|-----------------------|
| First and last name | _____                 |
| Date of birth       | _____                 |
| E-mail address      | _____                 |
| Phone number        | _____                 |
| GP                  | _____                 |
| Date                | _____ Signature _____ |

*\* Parents of children aged 12-15 years also have to sign 'Consent Form Parents/Guardians'*

## CONSENT FORM PARENTS/GUARDIANS

### *For parents of participants aged 4 – 15 years*

I have been asked to give consent for my child's participation in this medically scientific research.

- I have read the patient information letter. It was possible to ask questions. My questions are sufficiently answered. I had enough time to decide whether me and my child want to participate.
- I know that my participation is voluntary. I know I can decide at any moment to end my child's participation without providing a reason.
- I give consent to collect and use my child's data for the purposes mentioned in the patient information letter.
- I know that some persons can look at my child's data. These persons are mentioned in the patient information letter.
- I agree that me and my child participate in this research.

### Please tick the boxes:

- I give consent to use my data for a maximum of 15 years for comparable scientific research in the future.
- I give consent to be approached for future research.

### Please fill in:

|                             |                                                                          |                                                                          |
|-----------------------------|--------------------------------------------------------------------------|--------------------------------------------------------------------------|
| Child's first and last name | _____                                                                    |                                                                          |
| Child's date of birth       | _____                                                                    |                                                                          |
| GP                          | _____                                                                    |                                                                          |
|                             | Parent/guardian 1 *                                                      | Parent/guardian 2 *                                                      |
| Name                        | _____                                                                    | _____                                                                    |
| Date                        | _____                                                                    | _____                                                                    |
| Signature                   | <div style="border: 1px solid black; width: 150px; height: 40px;"></div> | <div style="border: 1px solid black; width: 150px; height: 40px;"></div> |
| E-mail                      | _____                                                                    | _____                                                                    |
| Phone                       | _____                                                                    | _____                                                                    |

### Please tick one of the boxes below

- There is joint parental authority and both parents have signed this form
- There is joint parental authority and I have notified the other parent/guardian
- There is no joint parental authority but there is one-headed authority

*\*When the child is younger than 16 years, the parents or guardians sign this form. Children between 12 and 15 years also have to sign 'Consent Form Participants'*
